# Supplementary material for: Transcriptome analysis reveals the molecular mechanisms of rubber biosynthesis and laticifer differentiation during rubber seed germination
Source: Front Plant Sci. 2024 Jan 24;15:1337451. doi: 10.3389/fpls.2024.1337451 (PMC10847244; doi:10.3389/fpls.2024.1337451)
Supplement: Supplementary file 5 [file Table_1.xlsx]

## Sheet: Sheet1
name		sequence
YSL8	F	5-’CCT CGT CGT CAT CCG ATT C-3′
	R	5-’CAG GCA CCT CAG TGA TGT C-3′
scaffold0221_308815	F	CGCTTGACCCGTTCTCTCTT
	R	TGGGACGAAACCTCTCTCCT
scaffold0434_538628	F	TTCGCCTTTGAACACATCGC
	R	CCACCACCTCAGATAAGCCC
scaffold0309_1225356	F	TGCTACCCAAGAGCGACAAG
	R	TCCACGGAGCTCAGCAATTT
